# Supplementary material for: Spectral-Kinetic Characterization of YF3: Eu3+ and YF3: (Eu3+, Nd3+) Nanoparticles for Optical Temperature Sensing
Source: Preprints.org preprint supplement (doi:10.20944/preprints202403.0863.v1), 2024-03-17
Supplement: Supplementary file 1 [file supplementary]

**SUPPLEMENTARY INFORMATION**

**Eu3+:YF3 and Eu3+, Nd3+:YF3 nanoparticles for optical temperature sensing: the influence of annealing on temperature dependence of the spectral-kinetic characteristics**

*Ekaterina I. Oleynikova1, Oleg. A. Morozov1,2, Stella L. Korableva1, and **Maksim S. Pudovkin1

*1Kazan Federal University, Institute of physics, Department of quantum electronics and radiospectroscopy, 18 Kremlyovskaya str, Kazan, 420008, Russian Federation*

*2FRC Kazan Scientific Center of RAS, Sibirsky Trakt str. 10, 420029, Kazan, Russia*

**Corresponding author:**

Ekaterina I. Oleynikova, kate15-05@mail.ru

Maksim S. Pudovkin, [jaz7778@list.ru](mailto:jaz7778@list.ru)

**Full postal address**: 18th Kremlyovskaya street. Kazan 420008, Russian Federation, Institute of physics, Department of quantum electronics and radiospectroscopy, office 168

**Keywords**

Lifetime thermometry, Nd3+/Yb3+, Nd3+/Yb3+:YF3, down-conversion, optical temperature sensors, thermal expansion

**YF3: Eu3+**


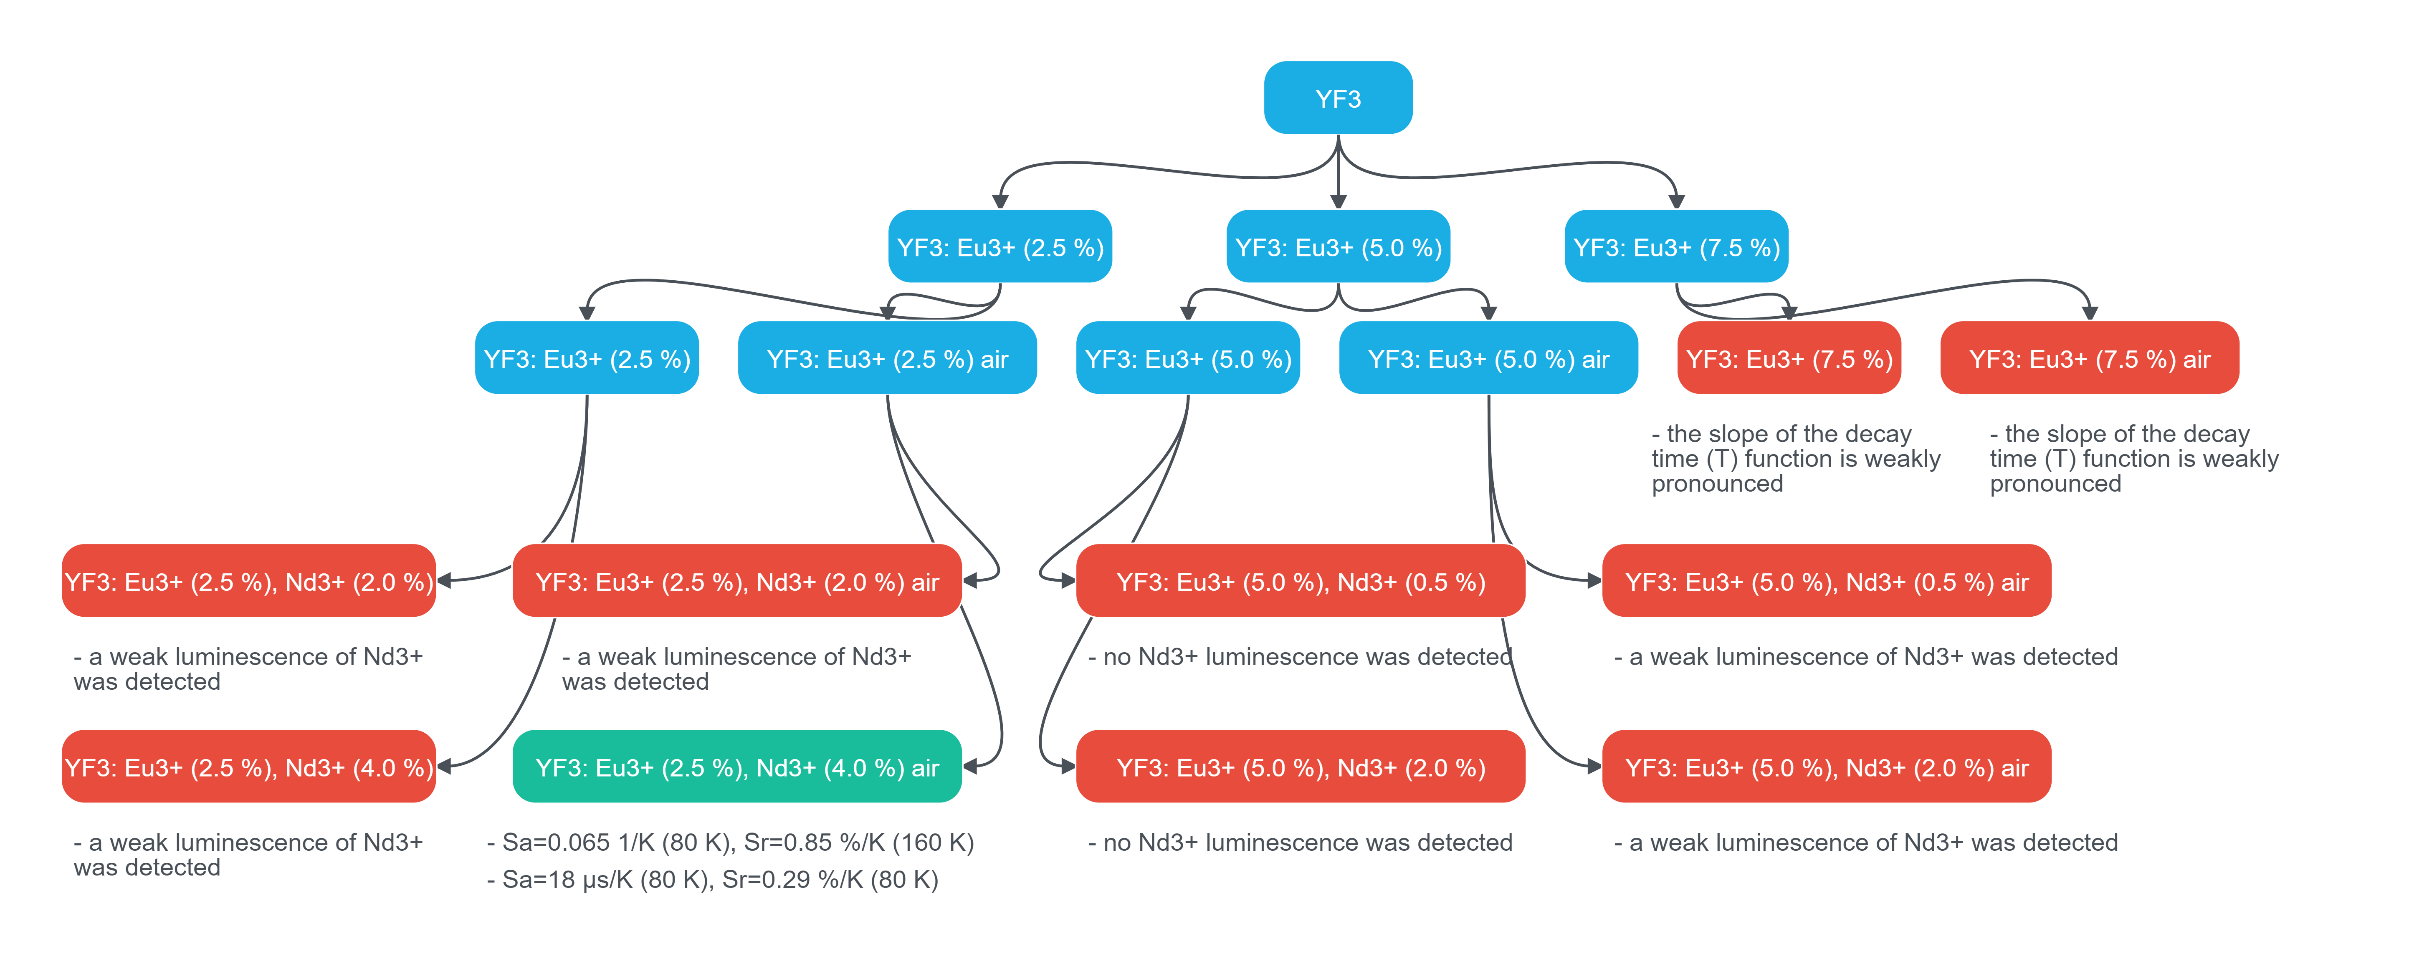


Table S1. The sample classification (the only “green” sample Eu3+ (2.5%), Nd3+(4.0%) :YF3 was chosen for further investigation

**
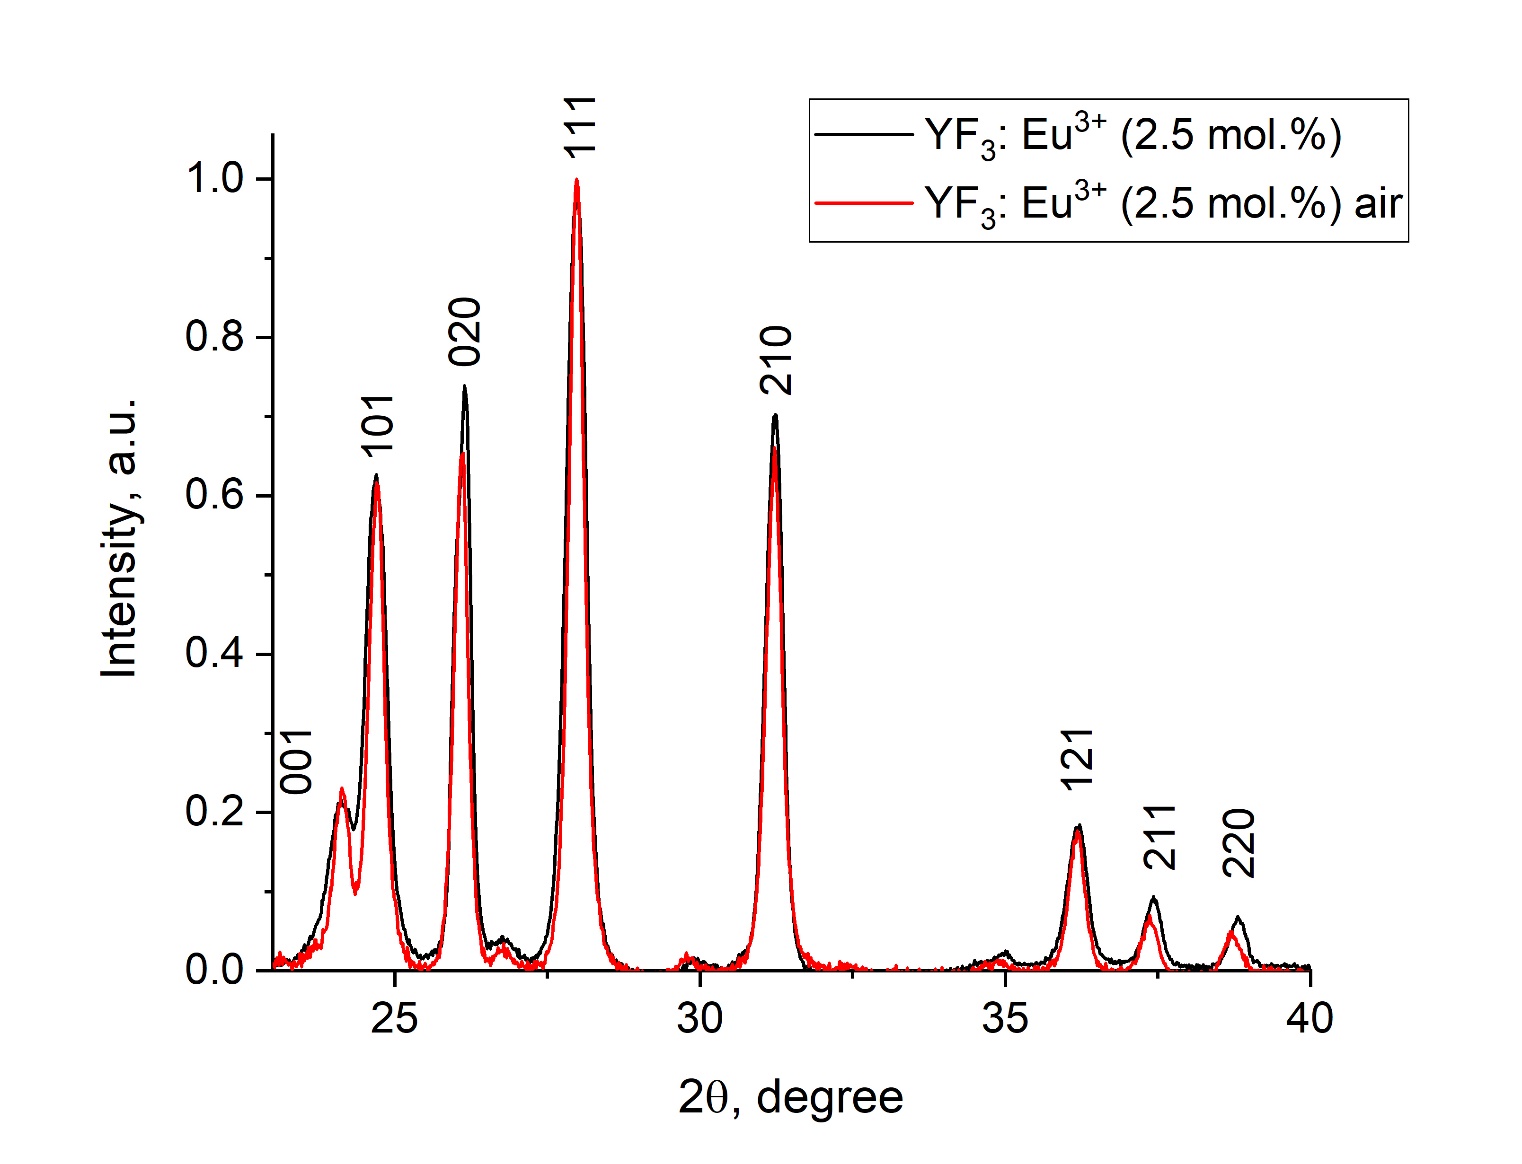
**

**Figure 1.** XRD patterns of YF3: Eu3+ (2.5 mol.%) nanoparticles before and after annealing in air (400 °C, 4 hours)

| 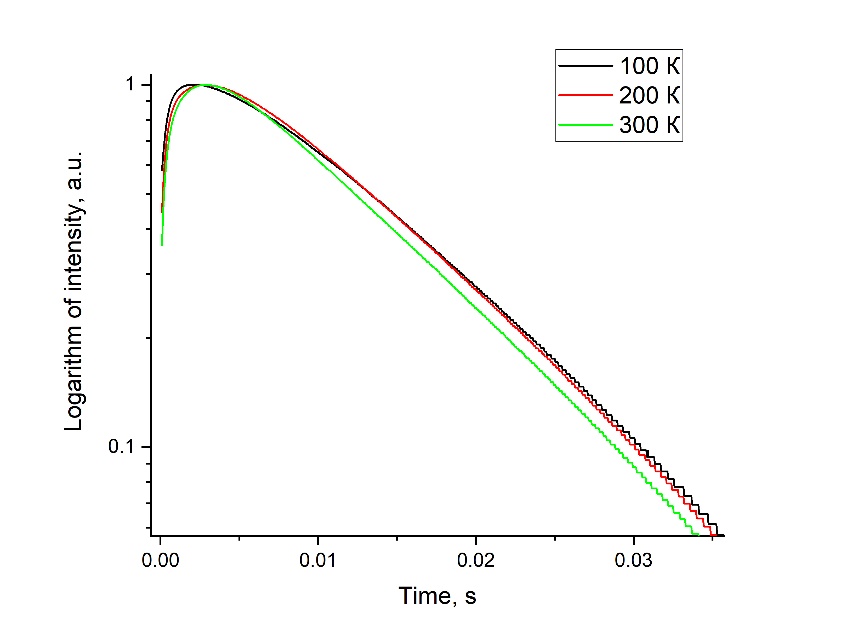 | 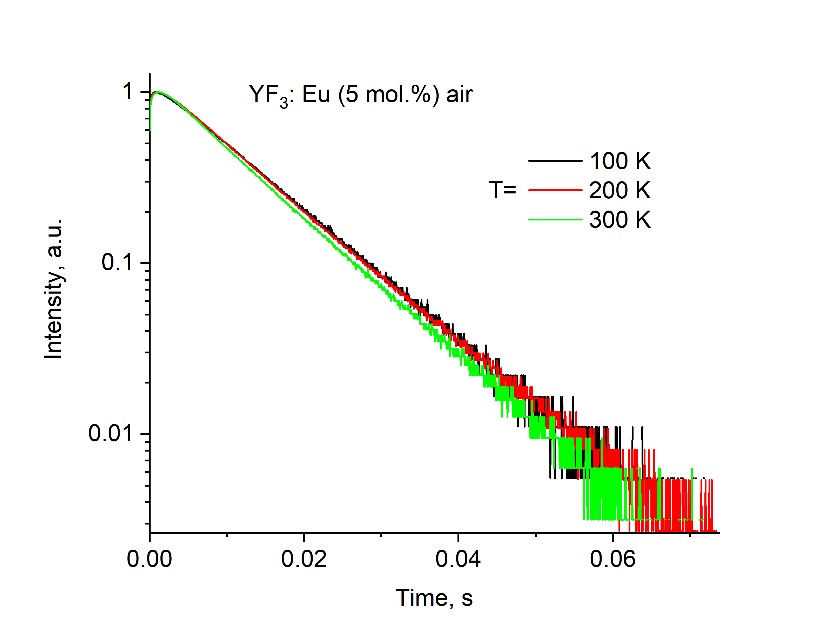 |
| --- | --- |
| (a) | (b) |
| 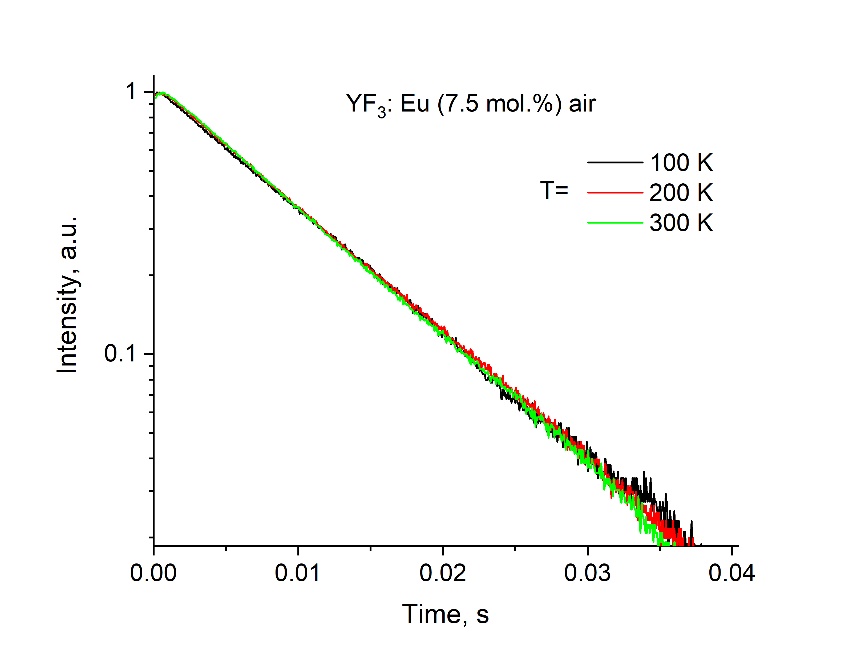 |  |
| **Figure S2.** Luminescence decay curves at 589.5 nm (5D0 – 7F1 transition) for YF3: Eu3+ (a) 2.5; b) 5.0 and c) 7.5 mol.%) samples annealed in air in the temperature range 80-320 K | |

| 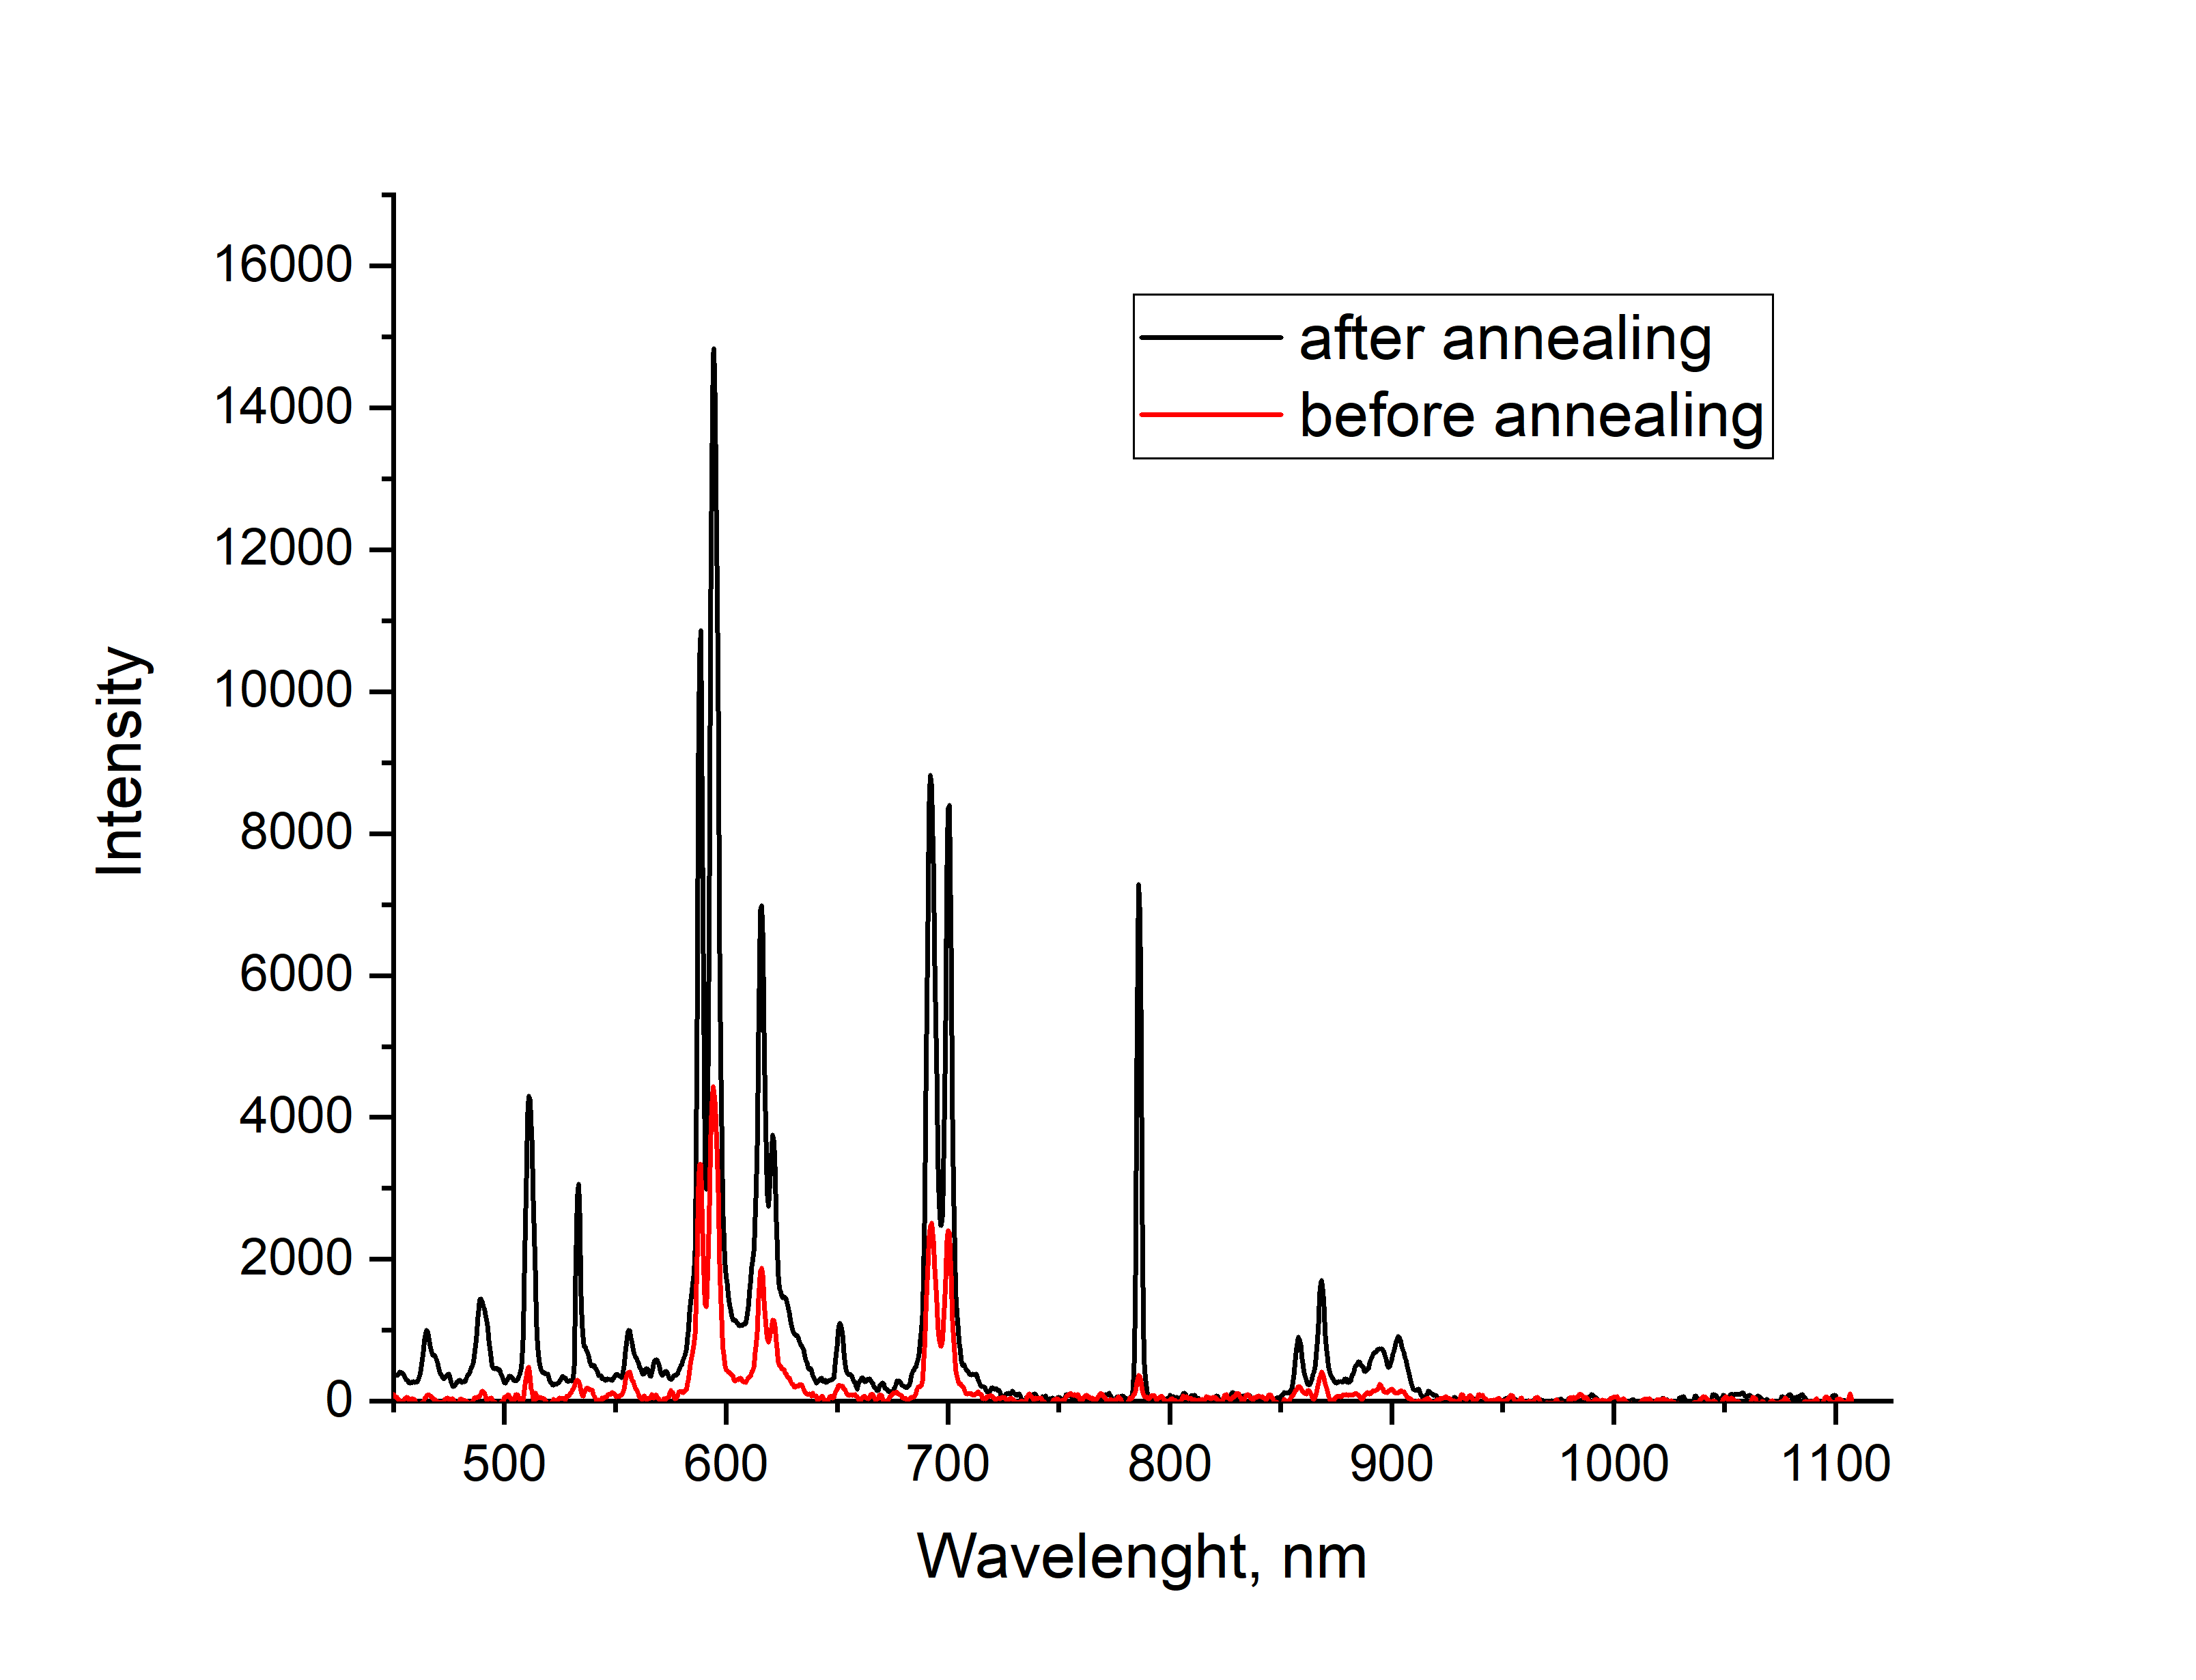 | 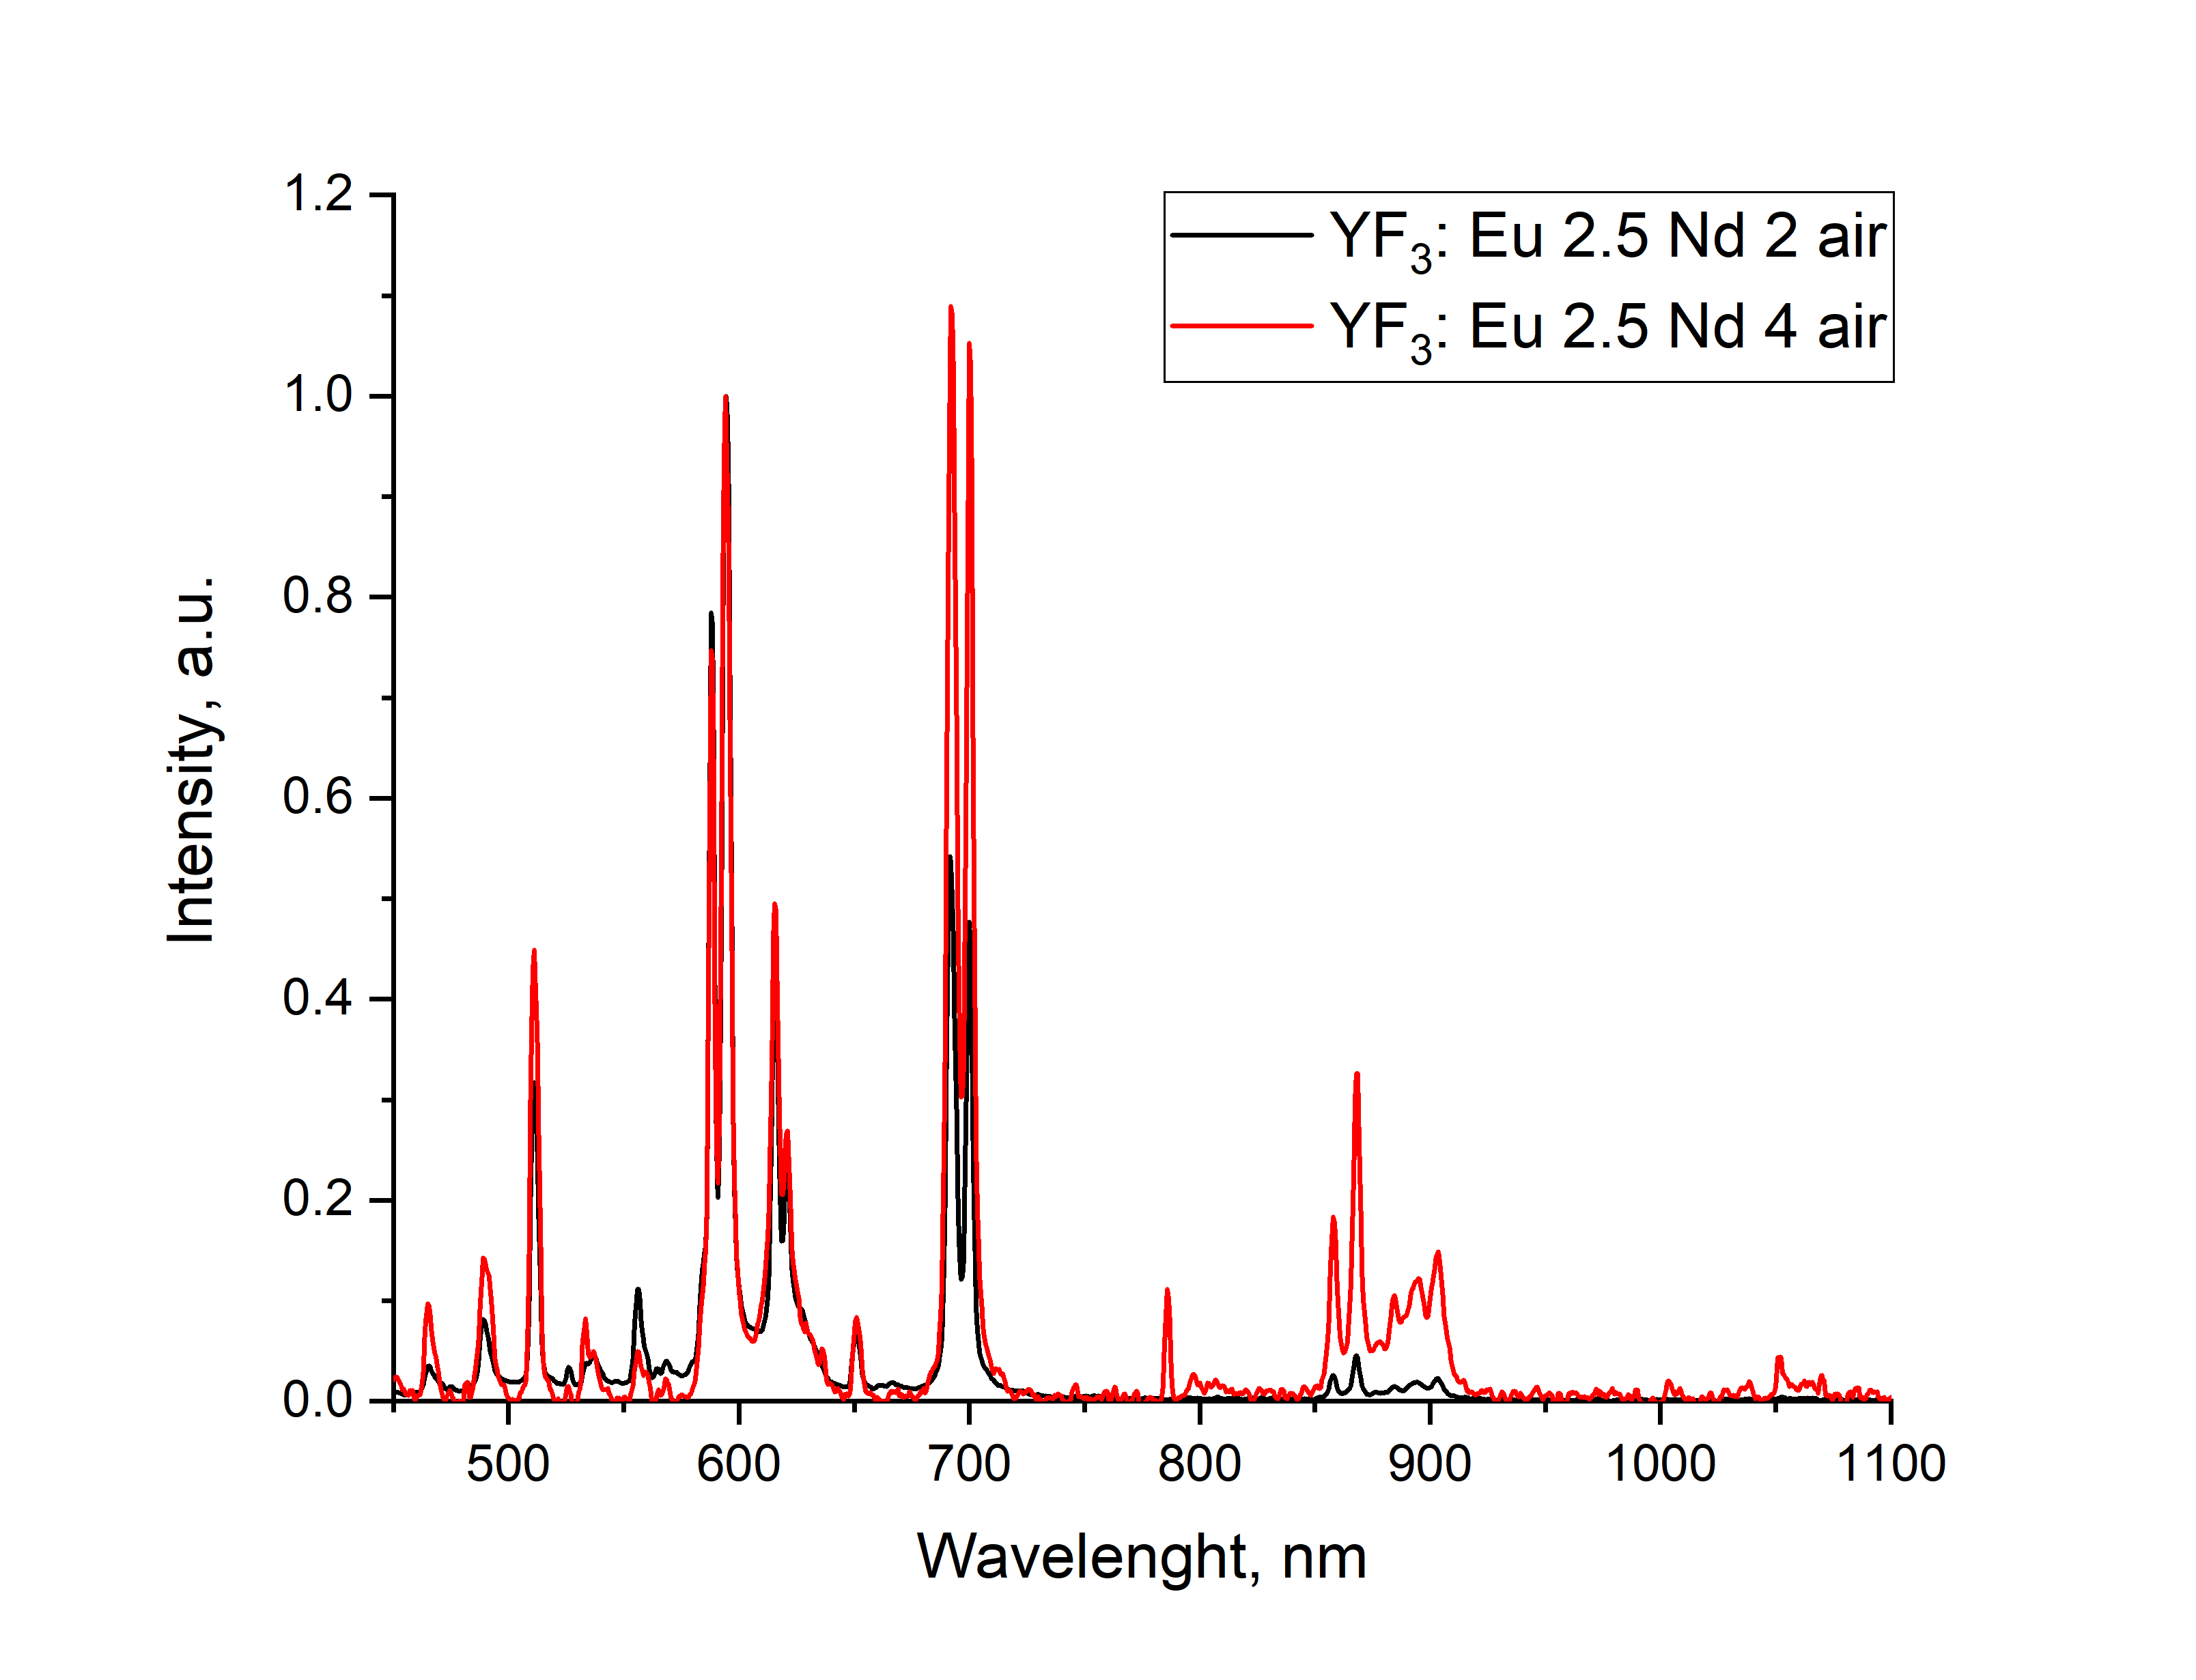 |
| --- | --- |
| (a) | (b) |
| 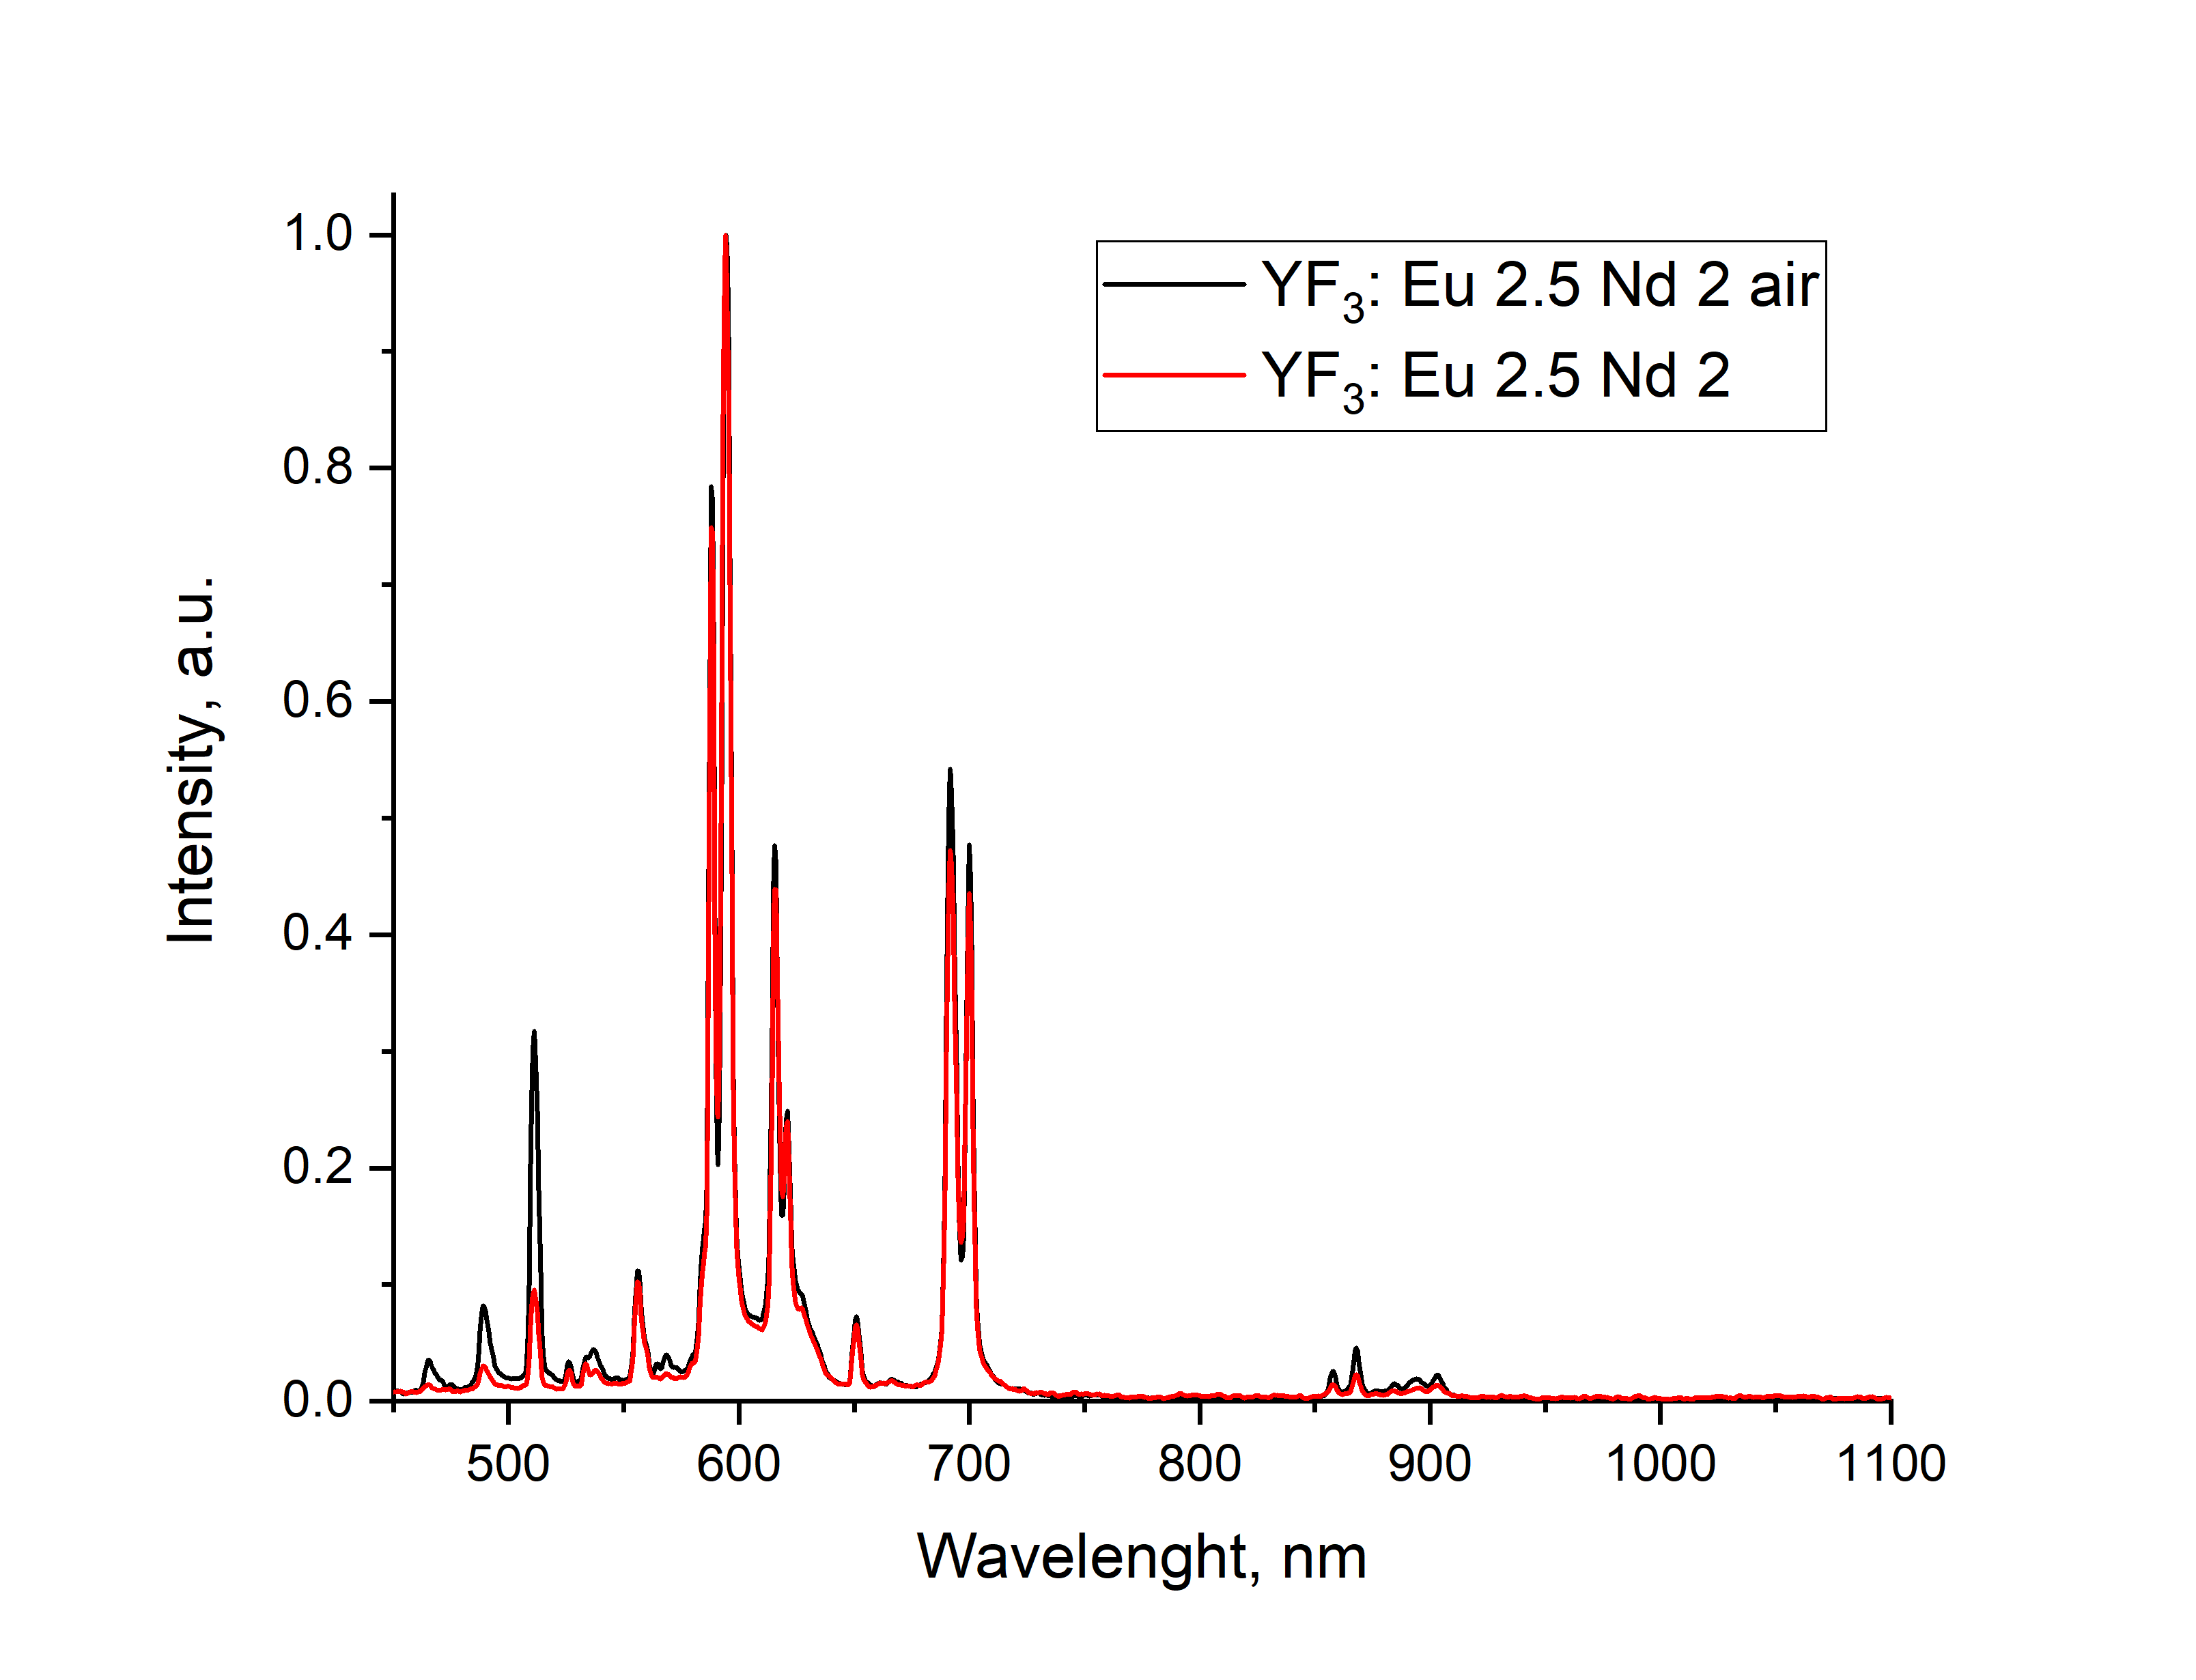 |  |
| (c) |  |

Figure S3.


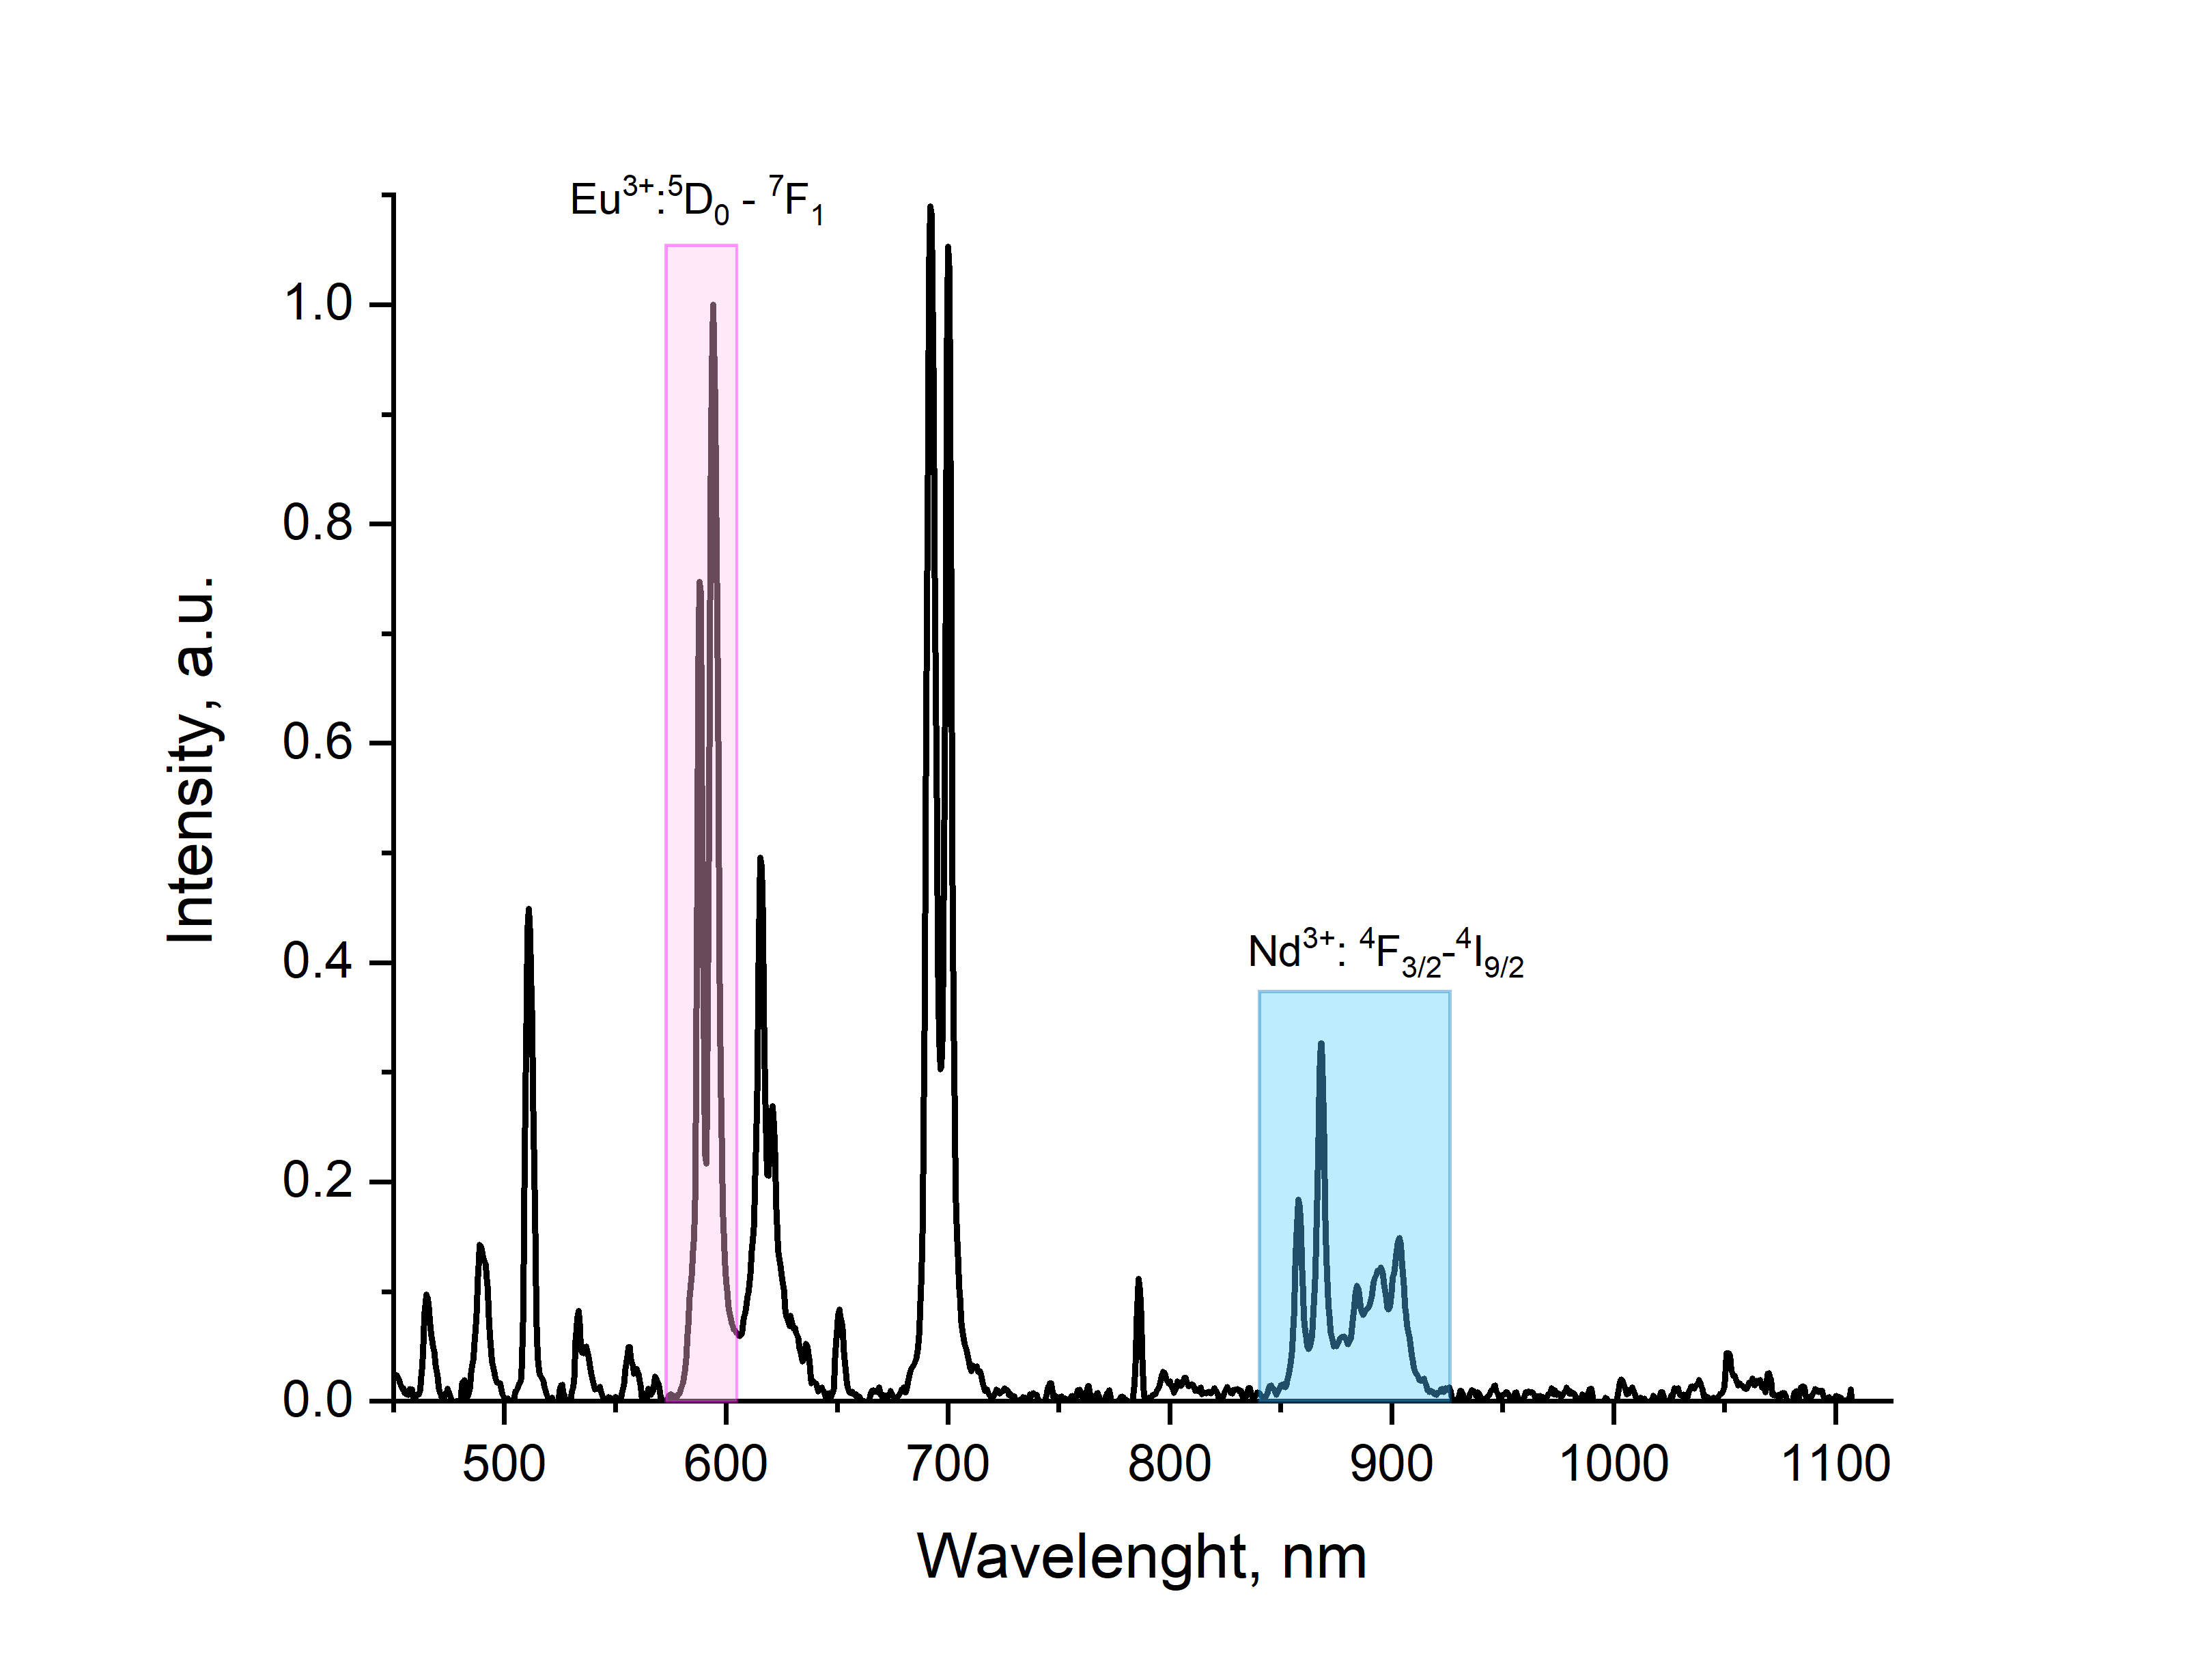


**Figure S4.** The schematic representation of LIR choice
